# Supplementary figures and images for: Pathogenesis of Port-Wine Stains: Directions for Future Therapies
Source: MDPI journal article supplement (doi:10.3390/ijms232012139), 2022-10-12

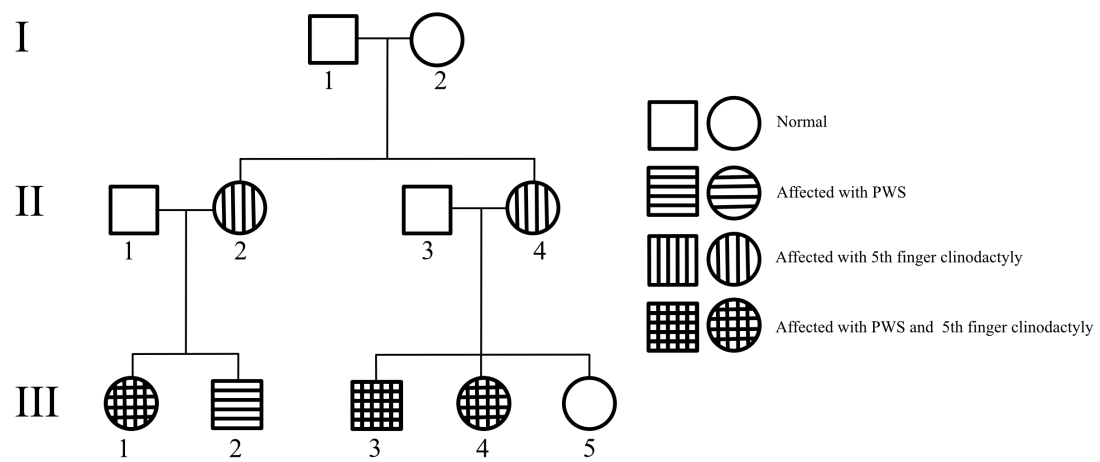

Figure S1 Family pedigree from the article “A family with hereditary port wine stain”

Supplement: s1 [file s1]
